# Supplementary material
Source: PubMed Central journal article supplement (PMC8542055)
Supplement: NIHMS1697126-supplement-1.pdf [file NIHMS1697126-supplement-1.pdf]

**Table S1.** ICD-9 and ICD-10 CM codes for baseline comorbidity and cause of hospitalization

|                                       | ICD-9 CM                          | ICD-10 CM                                |
|---------------------------------------|-----------------------------------|------------------------------------------|
| Pulmonary hypertension                | 416                               | I27                                      |
| Chronic renal disease                 |                                   |                                          |
| Stage 1                               | 585.1                             | N18.1                                    |
| Stage 2                               | 585.2                             | N18.2                                    |
| Stage 3                               | 585.3                             | N18.3                                    |
| Stage 4                               | 585.4                             | N18.4                                    |
| Stage 5                               | 585.5                             | N18.5                                    |
| Stage unknown                         | 585.9, 585                        | N18.9, N18                               |
| <b>Baseline comorbidity</b>           |                                   |                                          |
| Hyperlipidemia                        | 272.0, 272.1, 272.2, 272.3, 272.4 | E78.0, E78.1, E78.2, E78.3, E78.4, E78.5 |
| Obstructive sleep apnea               | 327.23                            | G47.33                                   |
| Stroke                                | 430 - 438                         | I60 - I69                                |
| Interstitial lung disease             | 515, 516                          | J84                                      |
| Systemic lupus erythematosus          | 710.0                             | M32                                      |
| <b>Cardiovascular hospitalization</b> |                                   |                                          |
| Cardiovascular disease                | 390 - 459                         | I00 – I99                                |

**Table S2.** PH and mortality by sex, diabetes, and race, among Medicare beneficiaries with CKD

| Stratum                   | Mortality per 1000 person-years |       | HR (95% CI), PH vs. non-PH |                   | P-value for interaction |
|---------------------------|---------------------------------|-------|----------------------------|-------------------|-------------------------|
|                           | non-PH                          | PH    | Model 1                    | Model 2           |                         |
| <i>Follow-up year 1</i>   |                                 |       |                            |                   |                         |
| Men                       | 113.9                           | 538.0 | 4.71 (4.54, 4.89)          | 2.90 (2.79, 3.02) | 0.5                     |
| Women                     | 101.8                           | 453.6 | 4.45 (4.30, 4.62)          | 2.85 (2.74, 2.96) |                         |
| No diabetes               | 101.0                           | 479.6 | 4.74 (4.58, 4.92)          | 2.89 (2.78, 3.00) | 0.8                     |
| Diabetes                  | 116.7                           | 497.6 | 4.25 (4.10, 4.41)          | 2.85 (2.74, 2.97) |                         |
| White                     | 110.2                           | 496.3 | 4.49 (4.37, 4.62)          | 2.86 (2.78, 2.95) | 0.4                     |
| African American          | 95.5                            | 440.1 | 4.63 (4.25, 5.04)          | 2.98 (2.73, 3.25) |                         |
| Hispanic                  | 113.4                           | 503.7 | 4.48 (3.59, 5.59)          | 2.72 (2.18, 3.40) |                         |
| Other race                | 79.3                            | 399.6 | 5.03 (4.17, 6.06)          | 3.14 (2.59, 3.81) |                         |
| <i>Follow-up year 2-3</i> |                                 |       |                            |                   |                         |
| Men                       | 109.8                           | 273.1 | 2.61 (2.49, 2.73)          | 1.62 (1.55, 1.70) | 0.02                    |
| Women                     | 101.9                           | 227.4 | 2.35 (2.26, 2.44)          | 1.51 (1.44, 1.57) |                         |
| No diabetes               | 101.3                           | 237.8 | 2.47 (2.37, 2.58)          | 1.54 (1.47, 1.61) | 0.3                     |
| Diabetes                  | 111.8                           | 253.1 | 2.36 (2.27, 2.47)          | 1.58 (1.51, 1.65) |                         |
| White                     | 108.4                           | 251.5 | 2.43 (2.36, 2.51)          | 1.56 (1.51, 1.62) | 0.3                     |
| African American          | 93.7                            | 206.2 | 2.30 (2.09, 2.54)          | 1.49 (1.34, 1.64) |                         |
| Hispanic                  | 93.9                            | 276.6 | 3.02 (2.37, 3.86)          | 1.88 (1.48, 2.39) |                         |
| Other race                | 82.5                            | 181.0 | 2.38 (1.90, 2.97)          | 1.45 (1.15, 1.82) |                         |
| <i>Follow-up year 4-5</i> |                                 |       |                            |                   |                         |
| Men                       | 115.2                           | 251.5 | 2.35 (2.20, 2.51)          | 1.45 (1.36, 1.55) | 0.5                     |
| Women                     | 104.4                           | 224.4 | 2.32 (2.19, 2.45)          | 1.48 (1.39, 1.57) |                         |
| No diabetes               | 102.7                           | 228.9 | 2.41 (2.27, 2.56)          | 1.54 (1.45, 1.64) | 0.05                    |
| Diabetes                  | 120.0                           | 240.7 | 2.14 (2.02, 2.28)          | 1.39 (1.30, 1.48) |                         |
| White                     | 112.6                           | 240.9 | 2.31 (2.20, 2.42)          | 1.47 (1.40, 1.54) | 0.7                     |
| African American          | 94.1                            | 194.6 | 2.21 (1.92, 2.53)          | 1.43 (1.24, 1.64) |                         |
| Hispanic                  | 101.8                           | 233.6 | 2.30 (1.57, 3.39)          | 1.45 (0.99, 2.11) |                         |
| Other race                | 88.5                            | 205.7 | 2.50 (1.86, 3.36)          | 1.62 (1.20, 2.18) |                         |

PH: pulmonary hypertension, CKD: chronic renal disease, HR: hazard ratio, CI: confidence interval

Model 1: crude model

Model 2: adjusting for age, sex, race, and comorbidities (diabetes mellitus, hypertension, coronary artery disease, heart failure, hyperlipidemia, chronic obstructive pulmonary disease, sleep apnea, stroke, liver disease, obesity, anemia, interstitial lung disease, systemic lupus erythematosus)

**Table S3.** PH and kidney failure by sex, diabetes, and race, among Medicare beneficiaries with CKD

| Stratum                   | Rate of kidney failure per 1000 person-years |      | Cause specific HR (95% CI), PH vs. non-PH |                   | P-value for interaction |
|---------------------------|----------------------------------------------|------|-------------------------------------------|-------------------|-------------------------|
|                           | non-PH                                       | PH   | Model 1                                   | Model 2           |                         |
| <i>Follow-up year 1</i>   |                                              |      |                                           |                   |                         |
| Men                       | 14.4                                         | 38.9 | 2.70 (2.38, 3.07)                         | 2.06 (1.80, 2.35) | 0.3                     |
| Women                     | 11.3                                         | 33.1 | 3.03 (2.68, 3.42)                         | 2.25 (1.99, 2.55) |                         |
| No diabetes               | 8.6                                          | 21.1 | 2.52 (2.16, 2.93)                         | 2.02 (1.73, 2.37) | 0.2                     |
| Diabetes                  | 18.5                                         | 50.5 | 2.73 (2.46, 3.04)                         | 2.28 (2.04, 2.55) |                         |
| White                     | 10.9                                         | 31.1 | 2.89 (2.62, 3.20)                         | 2.19 (1.97, 2.44) | 0.3                     |
| African American          | 23.6                                         | 67.4 | 2.95 (2.42, 3.60)                         | 2.31 (1.89, 2.83) |                         |
| Hispanic                  | 23.0                                         | 44.1 | 1.65 (0.87, 3.12)                         | 1.08 (0.56, 2.09) |                         |
| Other race                | 18.7                                         | 54.0 | 2.97 (1.86, 4.73)                         | 2.06 (1.30, 3.28) |                         |
| <i>Follow-up year 2-3</i> |                                              |      |                                           |                   |                         |
| Men                       | 13.5                                         | 21.4 | 1.65 (1.41, 1.92)                         | 1.21 (1.03, 1.42) | 0.8                     |
| Women                     | 9.3                                          | 13.6 | 1.56 (1.33, 1.84)                         | 1.17 (0.99, 1.37) |                         |
| No diabetes               | 7.5                                          | 8.5  | 1.20 (0.97, 1.48)                         | 0.97 (0.78, 1.20) | 0.02                    |
| Diabetes                  | 16.8                                         | 25.3 | 1.57 (1.38, 1.80)                         | 1.29 (1.12, 1.48) |                         |
| White                     | 9.7                                          | 15.3 | 1.66 (1.46, 1.88)                         | 1.26 (1.10, 1.43) | 0.1                     |
| African American          | 21.8                                         | 24.7 | 1.22 (0.92, 1.61)                         | 0.91 (0.69, 1.22) |                         |
| Hispanic                  | 18.2                                         | 36.0 | 1.97 (0.96, 4.01)                         | 1.31 (0.64, 2.66) |                         |
| Other race                | 15.4                                         | 18.3 | 1.56 (0.76, 3.19)                         | 1.01 (0.48, 2.09) |                         |
| <i>Follow-up year 4-5</i> |                                              |      |                                           |                   |                         |
| Men                       | 13.0                                         | 15.6 | 1.28 (0.98, 1.67)                         | 0.92 (0.70, 1.20) | 0.2                     |
| Women                     | 8.5                                          | 13.4 | 1.71 (1.35, 2.16)                         | 1.24 (0.98, 1.57) |                         |
| No diabetes               | 7.5                                          | 7.9  | 1.12 (0.82, 1.54)                         | 0.89 (0.65, 1.22) | 0.3                     |
| Diabetes                  | 15.5                                         | 21.4 | 1.45 (1.18, 1.80)                         | 1.17 (0.95, 1.45) |                         |
| White                     | 9.1                                          | 11.7 | 1.37 (1.12, 1.69)                         | 1.03 (0.83, 1.26) | 0.7                     |
| African American          | 20.2                                         | 30.2 | 1.55 (1.07, 2.26)                         | 1.15 (0.79, 1.68) |                         |
| Hispanic                  | 18.6                                         | 50.0 | 2.97 (1.18, 7.49)                         | 1.92 (0.69, 5.30) |                         |
| Other race                | 14.0                                         | 12.9 | 1.28 (0.39, 4.24)                         | 0.87 (0.25, 3.00) |                         |

PH: pulmonary hypertension, CKD: chronic renal disease, HR: hazard ratio, CI: confidence interval

Model 1: crude model

Model 2: adjusting for age, sex, race, and comorbidities (diabetes mellitus, hypertension, coronary artery disease, heart failure, hyperlipidemia, chronic obstructive pulmonary disease, sleep apnea, stroke, liver disease, obesity, anemia, interstitial lung disease, systemic lupus erythematosus)

**Table S4.** PH and hospitalization by sex, diabetes, and race, among Medicare beneficiaries with CKD

| Stratum                   | All-cause hospitalization rate, per year |      | RR (95% CI), PH vs. non-PH |                   | P-value for interaction |
|---------------------------|------------------------------------------|------|----------------------------|-------------------|-------------------------|
|                           | non-PH                                   | PH   | Model 1                    | Model 2           |                         |
| <i>Follow-up year 1</i>   |                                          |      |                            |                   |                         |
| Men                       | 0.59                                     | 2.55 | 5.84 (5.70, 5.99)          | 3.46 (3.37, 3.54) | 0.02                    |
| Women                     | 0.58                                     | 2.40 | 5.51 (5.38, 5.63)          | 3.30 (3.23, 3.38) |                         |
| No diabetes               | 0.50                                     | 2.21 | 6.04 (5.89, 6.18)          | 3.60 (3.51, 3.69) | <.0001                  |
| Diabetes                  | 0.70                                     | 2.72 | 5.05 (4.93, 5.17)          | 3.16 (3.08, 3.23) |                         |
| White                     | 0.58                                     | 2.42 | 5.63 (5.53, 5.74)          | 3.38 (3.32, 3.44) | 0.5                     |
| African American          | 0.65                                     | 2.79 | 5.50 (5.22, 5.78)          | 3.28 (3.12, 3.44) |                         |
| Hispanic                  | 0.67                                     | 3.08 | 6.01 (5.25, 6.87)          | 3.40 (2.99, 3.88) |                         |
| Other race                | 0.49                                     | 2.23 | 6.18 (5.50, 6.93)          | 3.64 (3.25, 4.07) |                         |
| <i>Follow-up year 2-3</i> |                                          |      |                            |                   |                         |
| Men                       | 0.54                                     | 1.27 | 2.54 (2.45, 2.63)          | 1.53 (1.48, 1.59) | 0.1                     |
| Women                     | 0.54                                     | 1.23 | 2.42 (2.35, 2.49)          | 1.47 (1.43, 1.52) |                         |
| No diabetes               | 0.47                                     | 1.07 | 2.45 (2.37, 2.53)          | 1.50 (1.45, 1.55) | 0.8                     |
| Diabetes                  | 0.64                                     | 1.43 | 2.36 (2.28, 2.43)          | 1.49 (1.45, 1.54) |                         |
| White                     | 0.53                                     | 1.21 | 2.44 (2.38, 2.50)          | 1.49 (1.46, 1.53) | 0.7                     |
| African American          | 0.60                                     | 1.46 | 2.52 (2.35, 2.70)          | 1.50 (1.40, 1.60) |                         |
| Hispanic                  | 0.59                                     | 1.75 | 2.98 (2.49, 3.57)          | 1.67 (1.40, 1.98) |                         |
| Other race                | 0.45                                     | 1.14 | 2.68 (2.27, 3.16)          | 1.54 (1.32, 1.81) |                         |
| <i>Follow-up year 4-5</i> |                                          |      |                            |                   |                         |
| Men                       | 0.54                                     | 1.16 | 2.29 (2.17, 2.41)          | 1.37 (1.30, 1.44) | 0.9                     |
| Women                     | 0.53                                     | 1.10 | 2.25 (2.15, 2.34)          | 1.37 (1.31, 1.43) |                         |
| No diabetes               | 0.47                                     | 0.96 | 2.20 (2.10, 2.31)          | 1.38 (1.32, 1.45) | 0.7                     |
| Diabetes                  | 0.63                                     | 1.31 | 2.18 (2.08, 2.28)          | 1.35 (1.29, 1.42) |                         |
| White                     | 0.53                                     | 1.10 | 2.22 (2.14, 2.30)          | 1.36 (1.32, 1.41) | 0.9                     |
| African American          | 0.59                                     | 1.33 | 2.38 (2.15, 2.64)          | 1.38 (1.25, 1.52) |                         |
| Hispanic                  | 0.63                                     | 1.44 | 2.36 (1.80, 3.10)          | 1.41 (1.09, 1.81) |                         |
| Other race                | 0.44                                     | 0.99 | 2.43 (1.92, 3.08)          | 1.47 (1.16, 1.87) |                         |

PH: pulmonary hypertension, CKD: chronic renal disease, RR: rate ratio, CI: confidence interval

Model 1: crude model

Model 2: adjusting for age, sex, race, and comorbidities (diabetes mellitus, hypertension, coronary artery disease, heart failure, hyperlipidemia, chronic obstructive pulmonary disease, sleep apnea, stroke, liver disease, obesity, anemia, interstitial lung disease, systemic lupus erythematosus)

**Table S5.** Associations of PH with kidney failure among Medicare beneficiaries with CKD, from the Fine-Gray model

|                           | HR (95% CI)       |                   |
|---------------------------|-------------------|-------------------|
|                           | Model 1           | Model 2           |
| <i>Follow-up year 1</i>   |                   |                   |
| Non-PH                    | 1.0 (referent)    | 1.0 (referent)    |
| PH                        | 2.12 (1.96, 2.30) | 1.74 (1.59, 1.89) |
| <i>Follow-up year 2-3</i> |                   |                   |
| Non-PH                    | 1.0 (referent)    | 1.0 (referent)    |
| PH                        | 1.38 (1.25, 1.53) | 1.11 (0.99, 1.23) |
| <i>Follow-up year 4-5</i> |                   |                   |
| Non-PH                    | 1.0 (referent)    | 1.0 (referent)    |
| PH                        | 1.31 (1.12, 1.55) | 1.03 (0.87, 1.21) |

PH: pulmonary hypertension, CKD: chronic renal disease, HR: hazard ratio, CI: confidence interval

Model 1: crude model

Model 2: adjusted for age, sex, race, and comorbidities (diabetes mellitus, hypertension, coronary artery disease, heart failure, hyperlipidemia, chronic obstructive pulmonary disease, sleep apnea, stroke, liver disease, obesity, anemia, interstitial lung disease, systemic lupus erythematosus)

**Table S6.** PH and all-cause mortality, kidney failure, and hospitalization among Medicare beneficiaries with CKD, limiting to a subset of patients with 1-year Medicare Part D enrollment before the index date

|                           | All-cause mortality         |                   | Kidney failure              |                                 | All-cause hospitalization |                   | CV hospitalization |                   | Non-CV hospitalization |                   |
|---------------------------|-----------------------------|-------------------|-----------------------------|---------------------------------|---------------------------|-------------------|--------------------|-------------------|------------------------|-------------------|
|                           | Rate, per 1000 person-years | HR (95% CI)<br>*  | Rate, per 1000 person-years | Cause specific HR (95% CI)<br>* | Rate, per year            | RR (95% CI)<br>*  | Rate, per year     | RR (95% CI)<br>*  | Rate, per year         | RR (95% CI)<br>*  |
| <i>Follow-up year 1</i>   |                             |                   |                             |                                 |                           |                   |                    |                   |                        |                   |
| Non-PH                    | 104.0                       | 1.0 (referent)    | 11.4                        | 1.0 (referent)                  | 0.56                      | 1.0 (referent)    | 0.15               | 1.0 (referent)    | 0.42                   | 1.0 (referent)    |
| PH                        | 461.9                       | 2.84 (2.71, 2.97) | 34.9                        | 2.42 (2.07, 2.82)               | 2.46                      | 3.43 (3.34, 3.53) | 1.00               | 4.63 (4.43, 4.83) | 1.46                   | 2.71 (2.63, 2.81) |
| <i>Follow-up year 2-3</i> |                             |                   |                             |                                 |                           |                   |                    |                   |                        |                   |
| Non-PH                    | 105.5                       | 1.0 (referent)    | 9.8                         | 1.0 (referent)                  | 0.52                      | 1.0 (referent)    | 0.13               | 1.0 (referent)    | 0.39                   | 1.0 (referent)    |
| PH                        | 246.3                       | 1.61 (1.53, 1.69) | 14.2                        | 1.22 (1.00, 1.49)               | 1.24                      | 1.55 (1.49, 1.60) | 0.41               | 1.88 (1.77, 1.99) | 0.83                   | 1.42 (1.36, 1.48) |
| <i>Follow-up year 4-5</i> |                             |                   |                             |                                 |                           |                   |                    |                   |                        |                   |
| Non-PH                    | 110.5                       | 1.0 (referent)    | 8.71                        | 1.0 (referent)                  | 0.50                      | 1.0 (referent)    | 0.13               | 1.0 (referent)    | 0.38                   | 1.0 (referent)    |
| PH                        | 237.6                       | 1.54 (1.42, 1.66) | 11.1                        | 1.09 (0.77, 1.53)               | 1.10                      | 1.39 (1.31, 1.47) | 0.36               | 1.64 (1.51, 1.80) | 0.74                   | 1.29 (1.21, 1.38) |

PH: pulmonary hypertension, CKD: chronic renal disease, CV: cardiovascular, HR: hazard ratio, RR: rate ratio, CI: confidence interval

\*Adjusted for age, sex, race, comorbidities (diabetes mellitus, hypertension, coronary artery disease, heart failure, hyperlipidemia, chronic obstructive pulmonary disease, sleep apnea, stroke, liver disease, obesity, anemia, interstitial lung disease, systemic lupus erythematosus), and medication use (statins, ACEi/ARBs, diuretics, beta-blocker)

**Table S7.** PH and all-cause mortality, kidney failure and hospitalization among Medicare beneficiaries with CKD, from patients with PH and patients without PH matched on the worst CKD stage

|                           | All-cause mortality         |                      | Kidney failure              |                                 | All-cause hospitalization |                      | CV hospitalization |                      | Non-CV hospitalization |                      |
|---------------------------|-----------------------------|----------------------|-----------------------------|---------------------------------|---------------------------|----------------------|--------------------|----------------------|------------------------|----------------------|
|                           | Rate, per 1000 person-years | HR (95% CI)<br>*     | Rate, per 1000 person-years | Cause specific HR (95% CI)<br>* | Rate, per year            | RR (95% CI)<br>*     | Rate, per year     | RR (95% CI)<br>*     | Rate, per year         | RR (95% CI)<br>*     |
| <i>Follow-up year 1</i>   |                             |                      |                             |                                 |                           |                      |                    |                      |                        |                      |
| Non-PH                    | 107.6                       | 1.0<br>(referent)    | 13.4                        | 1.0<br>(referent)               | 0.59                      | 1.0<br>(referent)    | 0.17               | 1.0<br>(referent)    | 0.42                   | 1.0<br>(referent)    |
| PH                        | 488.5                       | 2.89<br>(2.81, 2.97) | 35.5                        | 2.09<br>(1.90, 2.29)            | 2.46                      | 3.36<br>(3.30, 3.42) | 1.04               | 4.57<br>(4.45, 4.70) | 1.42                   | 2.62<br>(2.57, 2.67) |
| <i>Follow-up year 2-3</i> |                             |                      |                             |                                 |                           |                      |                    |                      |                        |                      |
| Non-PH                    | 104.7                       | 1.0<br>(referent)    | 11.9                        | 1.0<br>(referent)               | 0.55                      | 1.0<br>(referent)    | 0.15               | 1.0<br>(referent)    | 0.40                   | 1.0<br>(referent)    |
| PH                        | 245.3                       | 1.58<br>(1.53, 1.63) | 16.6                        | 1.14<br>(1.01, 1.28)            | 1.25                      | 1.49<br>(1.46, 1.53) | 0.43               | 1.77<br>(1.71, 1.84) | 0.82                   | 1.38<br>(1.34, 1.41) |
| <i>Follow-up year 4-5</i> |                             |                      |                             |                                 |                           |                      |                    |                      |                        |                      |
| Non-PH                    | 110.2                       | 1.0<br>(referent)    | 10.688                      | 1.0<br>(referent)               | 0.53                      | 1.0<br>(referent)    | 0.14               | 1.0<br>(referent)    | 0.39                   | 1.0<br>(referent)    |
| PH                        | 234.6                       | 1.48<br>(1.41, 1.54) | 14.2                        | 1.09<br>(0.91, 1.30)            | 1.12                      | 1.38<br>(1.33, 1.43) | 0.37               | 1.58<br>(1.50, 1.66) | 0.75                   | 1.30<br>(1.25, 1.35) |

PH: pulmonary hypertension, CKD: chronic renal disease, CV: cardiovascular, HR: hazard ratio, RR: rate ratio, CI: confidence interval

\*Adjusted for age, sex, race, and comorbidities (diabetes mellitus, hypertension, coronary artery disease, heart failure, hyperlipidemia, chronic obstructive pulmonary disease, sleep apnea, stroke, liver disease, obesity, anemia, interstitial lung disease, systemic lupus erythematosus)
